**Title:** The potential for gas-free measurements of absolute oxygen metabolism during both baseline and activation states in the human brain

**Authors:** Eulanca Y. Liu<sup>a,b</sup>, Jia Guo<sup>b</sup>, Aaron B. Simon<sup>b</sup>, Frank Haist<sup>c,d</sup>, David J. Dubowitz<sup>b,e</sup>, and Richard B. Buxton<sup>b,e</sup>

<sup>a</sup> Neurosciences Graduate Program, Medical Scientist Training Program, University of California, San Diego, USA

<sup>b</sup> Center for Functional MRI, University of California, San Diego, USA

<sup>c</sup> Psychiatry, University of California, San Diego, USA

<sup>d</sup> Center for Human Development, University of California, San Diego, USA

<sup>e</sup> Radiology, University of California, San Diego, USA

**Running title:** Gas-free measurements of oxygen metabolism in human brain

**Corresponding author:**

R.B. Buxton ([rbuxton@ucsd.edu](mailto:rbuxton@ucsd.edu))

University of California, San Diego, 9500 Gilman Drive, MC 0677, La Jolla, CA 92093-0677, USA

**Acknowledgements**

This work was supported by the National Institutes of Health grants NS036722, MH111359, MH112969, and MH113295.

The authors acknowledge and thank Kenny Jackson, Abel Martinez, Jessica Ho, and David Shin for their contributions to this project.

**Synopsis:** We tested noninvasive methods to measure absolute oxygen metabolism ( $CMRO_2$ ) in both baseline and activation states without the use of special gases: VSEAN to measure baseline  $O_2$  extraction fraction (OEF), and FLAIR-GESSE to measure  $R_2'$  to estimate the scaling parameter  $M$ . Primary findings were:  $CMRO_2$  changes to visual stimulation derived from  $R_2'$  were similar to estimates based on hypercapnia-derived  $M$ ; OEF values were in good agreement with previous PET findings; and, variation of baseline CBF/ $CMRO_2$  coupling across subjects does not follow activation coupling, suggesting different mechanisms may be involved. These results support the potential of gas-free methods for quantitative physiological measurements.

**Purpose:** To demonstrate the potential for two non-invasive techniques, VSEAN and FLAIR-GESSE, for absolute measurements of  $CMRO_2$  during both baseline and activation states.

## **Abstract**

Quantitative functional magnetic resonance imaging methods make it possible to measure cerebral oxygen metabolism ( $CMRO_2$ ) in the human brain. Current methods require the subject to breathe special gas mixtures (hypercapnia and hyperoxia). We tested a noninvasive suite of methods to measure absolute  $CMRO_2$  in both baseline and dynamic activation states without the use of special gases: arterial spin labeling (ASL) to measure baseline and activation cerebral blood flow (CBF), with concurrent measurement of the blood oxygenation level dependent (BOLD) signal as a dynamic change in tissue  $R_2^*$ ; VSEAN to estimate baseline  $O_2$  extraction fraction (OEF) from a measurement of venous blood  $R_2$ , which in combination with the baseline CBF measurement yields an estimate of baseline  $CMRO_2$ ; and FLAIR-GESSE to measure tissue  $R_2'$  to estimate the scaling parameter needed for calculating the change in

CMRO<sub>2</sub> in response to a stimulus with the calibrated BOLD method. Here we describe results for a study sample of 17 subjects (8 female, mean age=25.3 years, range 21-31 years). The primary findings were that OEF values measured with the VSEAN method were in good agreement with previous PET findings, while estimates of the dynamic change in CMRO<sub>2</sub> in response to a visual stimulus were in good agreement between the traditional hypercapnia calibration and calibration based on R<sub>2</sub>' . These results support the potential of gas-free methods for quantitative physiological measurements.

**Key words:** functional MRI, blood oxygenation level dependent, cerebral blood volume, hyperoxia, post-stimulus undershoot, cerebral metabolism of oxygen

**Abbreviations:**

BOLD: Blood Oxygenation Level Dependent

ASL: Arterial spin labeling

PICORE: Proximal inversion with control of off-resonance effects

QUIPSS II: Quantitative imaging of perfusion using a single subtraction II

VSEAN: Velocity-Selective Excitation and Arterial Nulling

FLAIR-GESSE: FLuid Attenuated Inversion Recovery Gradient Echo Sampling of Spin Echo

## 1. Introduction

The blood-oxygenation-level dependent (BOLD) signal has been used extensively for mapping changes of neural activity noninvasively in the human brain. However, the physiological complexity of the BOLD signal makes interpretation of BOLD data challenging, particularly in studies of development and disease. Quantitative fMRI methods, designed to measure the two physiological variables underlying the BOLD response—cerebral blood flow (CBF) and the cerebral metabolic rate of oxygen ( $CMRO_2$ )—may paint a more complete picture of neural physiology than BOLD alone.  $CMRO_2$  reflects the energy cost of neural activity and, when paired with CBF, may potentially provide information on the activity of specific neural populations (Buxton et al., 2014; Uhlirva et al., 2016b, 2016a). In addition, quantitative physiological measurements have the potential to expand clinical applications of fMRI, such as yielding fundamentally different conclusions about underlying physiology than possible with BOLD alone. The primary goal of technological development in this area is to measure both baseline values and activation changes in CBF and  $CMRO_2$  using quantitative physiological units. Quantitative and noninvasive measurements of CBF using arterial spin labeling (ASL) methods are now well established (Alsop et al., 2015). ASL allows for quantitative measurement of CBF across multiple image slices within a few seconds, depending on the technique and imaging volume. Given this short acquisition time, serial ASL images acquired over several minutes can either be averaged together to improve signal-to-noise ratio for average CBF measurement, or used as a dynamic time series to study CBF fluctuations over time (Griffeth and Buxton, 2011; Liu et al., 2019; Perthen et al., 2008).

In contrast, measuring  $CMRO_2$  is challenging with any technique (Buxton, 2010), and measuring baseline and dynamic change must be approached with two different classes of methods. The *fractional* change in  $CMRO_2$  can be measured with a calibrated BOLD approach based on simultaneous dynamic measurements of ASL and BOLD signals (Davis et al., 1998).

This approach requires an additional calibration experiment to determine a scaling parameter  $M$  in the model of the BOLD signal.  $M$  depends on the amount of deoxyhemoglobin in the baseline state of the individual, and directly scales the BOLD signal measured for that individual for given changes in CBF and  $CMRO_2$ . With this measured value of  $M$ , the CBF and BOLD responses to neural activation are analyzed with the same model of the BOLD signal to estimate the fractional change in  $CMRO_2$ . In the classic calibrated-BOLD method,  $M$  is calculated on a voxel-wise or region-of-interest (ROI) basis from measured CBF and BOLD responses to a hypercapnia challenge (Davis et al., 1998), with the assumption that the elevated  $CO_2$  produces a change in CBF with no change in  $CMRO_2$ . *Baseline*  $CMRO_2$  is approached by measuring the baseline oxygen extraction fraction (OEF), and several techniques have been proposed based on different ways in which the oxygenation of blood affects the MR signal. A current technique uses measurements of the BOLD response to breathing a gas with elevated  $O_2$ , in conjunction with the measurements of the response to  $CO_2$  (Bulte et al., 2012; Gauthier and Hoge, 2013; Merola et al., 2018; Wise et al., 2013).

This need to make measurements while the subject breathes controlled gas mixtures in the multi-gas approach makes quantitative fMRI a complicated procedure that limits wider application beyond research settings. In addition, wearing gas masks or breathing higher concentrations of  $CO_2$  and  $O_2$  would not be possible in some patient populations. To eliminate this barrier to entry into clinical applications, and for more widespread application of quantitative fMRI methods in basic brain studies, we evaluated two methods for measuring baseline and activation changes in  $CMRO_2$  that do not require the subject to breathe special gas mixtures. The calibration information to estimate  $M$  is based on measurement of tissue  $R_2'$ , essentially the component of transverse magnetization relaxation that can be reversed with a spin echo. Recent theoretical work (Blockley et al., 2015; Blockley and Stone, 2016), based on earlier seminal work of Haacke and Yablonskiy (Yablonskiy, 1998; Yablonskiy and Haacke, 1994),

showed that  $R_2'$ , like  $M$ , essentially depends on the total deoxyhemoglobin content of tissue. In this study,  $R_2'$  was measured with a modified FLuid Attenuated Inversion Recovery Gradient Echo Sampling of Spin Echo sequence (FLAIR-GESSE) method (Simon et al., 2016). The baseline  $CMRO_2$  measurement was done with a technique called Velocity-Selective Excitation and Arterial Nulling (VSEAN) (Guo and Wong, 2012) that isolates the signal of local venous blood and measures its relaxation rate  $R_2$ . Because  $R_2$  depends primarily on the  $O_2$  saturation of hemoglobin, applying an appropriate calibration curve provides a measurement of the local  $O_2$  extraction fraction (OEF), and together with a baseline CBF measurement from ASL provides a measurement of baseline  $CMRO_2$ . In this study, we evaluated the combination of these two gas-free techniques to make absolute baseline and activation  $CMRO_2$  measurements as an initial step toward more widespread applications of quantitative fMRI methods.

## **2. Methods**

### *2.1 Subjects*

Twenty-one healthy adults were recruited for the study. Inspired and end-tidal  $O_2$  and  $CO_2$  were monitored for all subjects throughout the run. Two of the 21 subjects were eliminated from the analyses because inspired and end-tidal  $O_2$  and  $CO_2$  measurements revealed leaks in the tubing or non-rebreathing facemask. Two other subjects exhibited no BOLD or flow change to the visual stimulus administration, demonstrating that the visual cortex was not well targeted. Thus, the study sample included 17 subjects (8 female, mean age=25.3 years, range 21-31 years). The study was approved by the Human Research Protections Program of the University of California, San Diego; written informed consent was obtained from all subjects. Subjects were remunerated for their participation.

## 2.2 Gas administration

Subjects were equipped with a non-rebreathing facemask (Hans Rudolph, KS, USA). The inspiratory port of the mask was connected to a large gas-tight balloon (VacuMed, CA, USA), pre-filled with a pre-mixed hypercapnia gas mixture of 5% CO<sub>2</sub>, 21% O<sub>2</sub>, balance N<sub>2</sub> (Airgas-West, CA, USA). The tubing (VacuMed, CA, USA) was disconnected to allow the subject to breathe normal room air in the normocapnic condition. End-tidal and inspired O<sub>2</sub> and CO<sub>2</sub> were monitored using a Perkin Elmer 1100 medical gas spectrometer (Perkin Elmer, Waltham, MA).

## 2.3 Imaging

2.3.1 BOLD-ASL. A dual-echo gradient echo spiral PICORE QUIPSS II ASL acquisition (Wong et al., 1998) was used to acquire simultaneous BOLD and ASL dynamic images on a General Electric (GE) Discovery MR750 3.0T scanner. Seven axial slices (5 mm thick/1 mm gap) covering the occipital cortex, centered around the calcarine sulcus, were obtained with TR=2500ms, TI1=700ms, TI2=1750ms, TE=3.3/30ms, 90° flip angle, FOV 256 mm x 256 mm, and matrix 64x64. Field maps with the same slice prescription were acquired to correct distortions in the spiral acquisition due to magnetic field inhomogeneity (Noll et al., 2005). Physiological monitoring was performed throughout the scan session using a pulse oximeter for cardiac cycle monitoring and respiratory bellows for respiratory dynamics (GE MR750 built-in).

2.3.2 VSEAN. The baseline CMRO<sub>2</sub> measurement was done with Velocity-Selective Excitation and Arterial Nulling (VSEAN) (Guo and Wong, 2012) that isolates the signal of local venous blood and measures its relaxation rate R<sub>2</sub>. Because R<sub>2</sub> depends primarily on the O<sub>2</sub> saturation of hemoglobin, this provides a measurement of the local O<sub>2</sub> extraction fraction (OEF). This method differentiates the signal of slowly moving blood from that of static tissue by velocity selective excitation, i.e., selectively generating signal only from slow moving spins in arterioles

and venules. An arterial-nulling preparation module isolates the venous blood signal, measured with multiple  $T_2$ -preparations of different effective TEs (eTEs) (Guo and Wong, 2012). The sole center slice of the BOLD-ASL prescription was used as the single 10mm VSEAN slab. Details of the acquisition are as follows:

*Arterial nulling:* A slab-selective inversion pulse (arterial inversion slab thickness = 150mm) inverted a bolus of arterial blood below the imaging plane, with an inversion/delay time  $TI=1150$ ms to allow the inverted bolus of arterial blood to arrive at the imaging plane at the null point of the arterial blood's longitudinal magnetization during image acquisition. The spins of the static tissue and venous blood in the imaging slice were unperturbed, giving a strong venous signal.

*Velocity-Selective Excitation (VSE) for flow signal separation:* Two VSE pulse modules (one BIR4-based pulse train with velocity-sensitive gradient pulses, the second built into the image acquisition using only velocity-sensitive gradient pulses) excited and separated slow moving spins without generating signal from static or extremely slow flowing spins.

*$T_2$  measurement and oxygenation estimation:*  $T_2$  preparation module (eTEs of 25/50/75ms with incremental gaps between RF pulses, built into the first BIR-4 based VSE module) measured  $T_2$ . The  $T_2$  values were translated to blood oxygen saturation of hemoglobin  $Y$  via a  $T_2$ - $Y$  calibration curve. We used the calibration curve from Zhao and colleagues based on a bovine blood sample measured *in vitro* at 3 Tesla (Zhao et al., 2007), which used a similar  $T_2$  measurement setup as in this study. The equation for the curve used in this analysis is  $T_2^{-1}(s^{-1}) = 8.3 + 33.6 \cdot (1 - Y) + 71.9 \cdot (1 - Y)^2$  (Guo and Wong, 2012). The OEF was then taken as  $1-Y$ , based on the assumptions that arterial hemoglobin was fully saturated with oxygen and dissolved  $O_2$  was negligible compared to hemoglobin-bound  $O_2$ .

*Other pulse sequence parameters:* FOV = 256 mm x 256 mm, matrix = 64 x 64, single-slice spin echo with spatial-spectral excitation, two slice-selective hyperbolic secant refocusing



pulses, single-shot spiral readout, TR/TE=3s/28ms,  $v_e=2$  cm/s in slice-selective direction, slice-selective post-saturation pulses, 81 acquisitions preceded by two dummy scans and including six “cos” modulated reference scans (Guo and Wong, 2012). The total scan time was 4:03.

2.3.3 FLAIR-GESSE. We measured  $R_2'$  with a FLuid Attenuated Inversion Recovery Gradient Echo Sampling of Spin Echo (FLAIR-GESSE) (Simon et al., 2016) technique. FLAIR-GESSE measures a series of gradient echo samples around a spin echo following Yablonskiy and Haacke’s GESSE method with two main modifications (Simon et al., 2016). First, a CSF-nulling FLAIR module is added to minimize CSF contamination of  $R_2'$  measurements. Our previous work has found that CSF-nulling improves the stability of  $R_2'$  measurements (Simon et al., 2016). Second, the two sides of the echo are sampled with two acquisitions; each has a different spin echo time so that the acquired data are at the same absolute time after excitation. This helps correct for problems with multiple  $T_2$  values within a voxel. Since  $R_2'$  is sensitive to large-scale field inhomogeneity in addition to sub-voxel inhomogeneity due to deoxyhemoglobin, field offsets are acquired in the FLAIR-GESSE acquisition that are then used to calculate the large-scale field inhomogeneity and remove their contribution to the  $R_2'$  estimate (Dickson et al., 2010). The center of each slice from the BOLD-ASL prescription was used, though for FLAIR-GESSE the slices were 2 mm thick, with a gap of 4 mm. The pulse sequence parameters included two pairs of GESSE image series, one as an early spin echo series (63.6 ms after excitation) and one as a late spin echo series (83.6 ms after excitation), collected separately. For each spin echo series, 64 samples of each decay curve were collected asymmetrically. CSF nulling was chosen for middle slices, with a TR of 3.5 s, inversion time TI of 1.16 s, matrix = 64 x 64, and FOV = 256 mm x 256 mm. Each image slice was acquired in ascending order with a spacing of 110 ms. Each of the two spin echo series was 3:58 in duration.  $R_2'$  was calculated by the method described in Simon et al., 2016.

2.3.4 Calibration and reference scans. A cerebral spinal fluid (CSF) reference scan using a single-echo spiral EPI acquisition (TE = 3.3ms, TR = 4000ms,  $\infty$  effectively) was obtained for CBF quantification (Chalela et al., 2000; Liu et al., 2004; Perthen et al., 2008). A minimum contrast scan (eight-shot spiral acquisition, TE=11ms, TR=2000ms) was made to correct for transmit and receive coil inhomogeneities (Wang et al., 2005). These reference and calibration scans used the same prescription as the ASL acquisition. A high resolution T<sub>1</sub>-weighted anatomical scan (FSPGR) was acquired for image registration and segmentation.

#### *2.4 Stimulus paradigm*

The visual stimulus task used to elicit neural activity in the occipital lobe (V1) was a black and white flickering radial checkerboard (6 Hz light-dark reversal frequency) with contrast and luminance as described in previous work (Simon et al., 2016). The central region was maintained at iso-luminant gray with visual angle  $\sim 1.5^\circ$ . The stimulus was presented using MATLAB (2014a, The MathWorks, MA, USA) with the Psychophysics Toolbox extensions (Brainard, 1997; Pelli, 1997). The subject viewed the stimulus, projected onto a screen, through a mirror set atop the head coil.

#### *2.5 Experimental setup*

BOLD and ASL responses were measured during a baseline task and to a visual stimulus in normocapnia. A hypercapnia calibration measurement and separate VSEAN and FLAIR-GESSE acquisitions in normocapnia were performed with the baseline task. The baseline state for all acquisitions performed in this experiment was a 1-back task (Kirchner, 1958) projected on a cross at the center of the screen. Subjects fixated at this center cross and performed the 1-back task that presented single digits sequentially at random in 1-second intervals. The subjects were instructed to press a button on a response box each time they

observed a number repeated sequentially. As this served as the baseline state, the task was performed continuously throughout each acquisition, with the ON or OFF states representing the presence of a visual stimulus, which was the flickering checkerboard described above filling the visual field surrounding the center cross. Given the 11-minute duration of the BOLD/ASL acquisition, the 1-back task was chosen as the baseline rather than a resting state (visual fixation on a cross) to hold the subject's attention throughout the long scan.

The BOLD/ASL acquisition consisted of an 11-min run, starting at normoxia/normocapnia with 3 blocks of 30-sec OFF/30-sec ON visual localizer at the beginning to independently determine an activated visual region of interest (ROI). The following experimental stimuli consisted of 2 blocks of 1-min OFF/1-min ON visual stimulus. The final 4 minutes of the BOLD/ASL acquisition was the calibrated BOLD experiment with a 1-min baseline period at normoxia/normocapnia, then a 3-min block of 5% CO<sub>2</sub> administration (normoxia/hypercapnia). A schematic of the run is shown in Figure 1.

The FLAIR-GESSE and VSEAN acquisitions as described above were all acquired at the baseline state (1-back task with no visual stimulus). Calibration and reference scans were acquired pre- and post-experimental acquisitions.

## *2.6 Data preprocessing*

2.6.1 Arterial Spin Labeling (ASL) images: Raw ASL images were first corrected for inhomogeneity in the magnetic field using the field map acquisition (Noll et al., 2005). The functional scan was motion corrected and registered to one image in the 11-minute run using AFNI software (Cox, 1996). The first four images of the run were discarded to allow the signal to reach steady state. Minimum contrast images were used to correct ASL data for coil sensitivity inhomogeneity (Wang et al., 2005). Applying surround-subtraction to the raw first-echo ASL images produced CBF-weighted images with minimal contamination from BOLD (Liu and Wong,

2005), and these were converted to physiological units (ml/100ml/min) using CSF as a reference (Chalela et al., 2000). A gray matter mask was determined from the absolute CBF with a cut-off of twice the mean of the average CBF. For the visual ROI determination in 2.6.3, the gray matter mask was limited to the posterior third of the brain via a binary wedge-shaped mask covering the posterior third.

2.6.2. BOLD  $R_2^*$ -weighted images: BOLD  $R_2^*$ -weighted images were calculated from surround averaging of the first and second echo ASL images (Liu and Wong, 2005) to enable calculation of  $R_2^*$  for each time point as previously reported (Liu et al., 2019). For each time series, after ROI selection (Section 2.6.3), the mean  $R_2^*$  was subtracted to form a time series  $\Delta R_2^*(t)$ , which removed systematic effects of drift that scale identically with both echoes;  $\Delta R_2^*$  was then converted back to a  $\delta$ BOLD signal without the drift effects (Liu et al., 2019).

2.6.3 Regions of interest (ROIs): Visual ROIs were generated using the ASL and BOLD responses to the 3-min visual functional localizer exclusively, then limited to the center slice that was used for VSEAN. A general linear model approach, described by Perthen et al. (Perthen et al., 2008), was used for ROI selection. The pattern of the stimulus was convolved with a gamma density function to produce a stimulus regressor (Boynton et al., 1996). A constant and a linear term were used as nuisance regressors. A mask containing only gray matter voxels, as determined in 2.6.1, in the posterior third of the brain was used to further restrict the ROI selection. Voxels exhibiting both CBF and BOLD activations were detected using an overall significance threshold of  $p=0.05$  and minimum cluster size of 2. Thus, the final visual ROI for each subject consisted of a single mask of voxels exhibiting independent activation in both CBF and BOLD to the visual stimulus, restricted to gray matter in the posterior third of the brain.

2.6.4. Average CBF and BOLD changes to stimuli. Average CBF and  $R_2^*$  from BOLD (Section 2.6.2) time courses for the ROI were calculated for each subject, producing one-dimensional BOLD and CBF time courses. The resulting time series were normalized to an

average baseline value, defined as the mean of the 15 seconds of rest before the first normoxia visual stimulus (at the 4-min mark), the 15 seconds of rest before the second normoxia visual stimulus (at the 6-min mark), and the 15 seconds of rest before the CO<sub>2</sub> stimulus onset (at the 8-min mark). These normalized values were used for all subsequent analyses. To allow time for the subjects' inspired and end-tidal gas levels to stabilize and equilibrate, data from the first minute of the hypercapnia block were not used subsequently. To derive single estimates of CBF and BOLD responses for each subject, the two visual stimulus blocks were first averaged.

### 2.7 Calibrated BOLD and FLAIR-GESSE analysis

In the classic calibrated-BOLD method (Davis et al., 1998) to measure the fractional change in CMRO<sub>2</sub> with activation, the BOLD signal is modeled as:

$$\delta BOLD_{act} = M \cdot \left( 1 - (1 + \delta CBF)^\alpha \left( \frac{1 + \delta CMRO_2}{1 + \delta CBF} \right)^\beta \right) \quad [1]$$

where the prefix “ $\delta$ ” indicates the change in the variable normalized to the baseline value. The scaling parameter  $M$  is approximately proportional to the total deoxyhemoglobin content of tissue, which could vary across brain regions and subjects. The parameters  $\alpha$  and  $\beta$  were originally introduced to describe specific physical effects related to the change in venous blood volume and nonlinearities of the magnetic susceptibility effects, respectively (Davis et al., 1998). However, that original derivation left out several factors affecting the BOLD signal, and later modeling studies including these factors found that the mathematical form of Eq. [1] is still accurate, but the parameters  $\alpha$  and  $\beta$  are now thought of more as fitting parameters rather than reflecting their original physical meanings (Buxton, 2013; Gagnon et al., 2016, 2015; Griffeth and Buxton, 2011; Merola et al., 2016). The standard approach to estimate  $M$  is to measure CBF and BOLD responses to hypercapnia, and analyze the data with Eq. [1] and the assumptions: 1) there is no CMRO<sub>2</sub> change during hypercapnia; and 2) particular values of  $\alpha$

and  $\beta$ , typically  $\alpha=0.2$  and  $\beta=1.3$  (Chen and Pike, 2009; Griffeth et al., 2013; Mark et al., 2011).

With these assumptions, the scaling factor  $M$  is calculated from the hypercapnia data. The activation data are then analyzed with the estimated value of  $M$  and the same assumed values for  $\alpha$  and  $\beta$  to estimate the fractional CMRO<sub>2</sub> change to the stimulus.

In the current study, we compared the classic hypercapnia estimate of  $M$  with a measurement of  $R_2'$ , approximately the difference in transverse relaxation rates measured in gradient echo and spin echo experiments:  $R_2' \cong R_2^* - R_2$ . The parameter  $R_2'$  is sensitive to magnetic field inhomogeneities due to 1) deoxygenated blood vessels, proportional to voxel baseline deoxyhemoglobin concentration, like  $M$ , and 2) large-scale inhomogeneities of the head. The inhomogeneity correction was done as in Simon et al., 2016, and the remaining  $R_2'$  value was interpreted as reflecting deoxygenated blood vessels. Neglecting some of the complexities of tissue relaxation (see Discussion), we would expect  $M \cong M' = TE \bullet R_2'$  (Blockley et al., 2015).

FLAIR-GESSE data were analyzed per Simon, et al. 2016. The raw GESSE data were first averaged across the visual ROI before  $R_2$  and  $R_2'$  values were fitted to the averaged data. Magnetic field inhomogeneities were corrected per Dickson et al. (Dickson et al., 2010).  $M'$  was calculated from  $R_2'$  values through  $M' \cong TE \bullet R_2'$ . Fractional change in CMRO<sub>2</sub> ( $\delta$ CMRO<sub>2</sub>) to the visual stimulus for each individual was calculated per Eq. [1] ( $\alpha=0.2$ ,  $\beta=1.3$ ) using the individual  $M'$  value for each subject, as well as with the group mean  $M'$ , to compare estimates of  $\delta$ CMRO<sub>2</sub> using individual  $M'$  versus group mean  $M'$ . Meanwhile, the hypercapnia response BOLD data were also substituted into Eq. [1] to yield an estimate of  $M$  for each subject, calculated for  $\alpha=0.2$ ,  $\beta=1.3$ .  $\delta$ CMRO<sub>2</sub> to the visual stimulus for each individual was then calculated per Eq. [1], ( $\alpha=0.2$ ,  $\beta=1.3$ ) using the individual  $M$  value for each subject, as well as with the group mean  $M$ ,

to compare estimates of  $\delta\text{CMRO}_2$  using individual  $M$  versus group mean  $M$ . These values were compared to those using  $M'$ .

## 2.8 VSEAN and baseline $\text{CMRO}_2$ analysis

VSEAN data were analyzed per Guo et al. 2012. Raw multi-echo data were averaged over the visual ROIs first, then used to fit a  $T_2$  value representative of the entire ROI. The  $T_2$  was then converted into blood oxygenation (Y) levels via  $T_2$ -Y calibration curve at 3T (Zhao et al., 2007). OEF was calculated from venous oxygenation (OEF = 1 – venous oxygenation).

Baseline  $\text{CMRO}_2$  was calculated from

$$\text{CMRO}_2 = \text{CBF} \cdot \text{OEF} \cdot \text{CaO}_2. \quad [2]$$

The equation to determine total arterial oxygen concentration is:  $\text{CaO}_2 = 1.36(\text{Hb})(\text{S}_a\text{O}_2/100) + 0.0031(\text{P}_a\text{O}_2)$ , with units as follows:  $\text{CaO}_2$  in ml/dL, 1.36 ml  $\text{O}_2$ /1 g Hb, Hb in g/dL,  $\text{S}_a\text{O}_2$  in %, 0.0031 g/dl/mmHg, and  $\text{P}_a\text{O}_2$  in mmHg (Davenport, 1974). Hemoglobin concentration was assumed according to mean healthy ranges set by UC San Diego Health (Fraser and Haldeman-Englert, 2017); for females, [Hb] = 14g/dL; males, [Hb]=15.7g/dL. The age of each subject was also factored into  $\text{CaO}_2$  determination through the estimate of  $\text{P}_a\text{O}_2$  (Estimated normal  $\text{P}_a\text{O}_2 \cong 100 \text{ mmHg} - (0.3) \text{ age in years}$ ) (Crawford and Adesanya, 2010; Jurado and Walker, 1969). CBF is expressed in ml/100ml/min, and  $\text{CaO}_2$  from this equation is divided by 100 to give  $\text{CMRO}_2$  units in ml/100ml/min.  $\text{CMRO}_2$  in ml/100ml/min is then converted to mM/min (1 mL  $\text{O}_2$  at 310 K, 1 atm = 0.03933 mmol  $\text{O}_2$ ) (Davenport, 1974). For reference, 1 mM/min = 2.54 ml  $\text{O}_2$ /100 ml/min = 2.42 ml  $\text{O}_2$ /100g/min = 100  $\mu\text{mol}$ /100 ml/min = 95  $\mu\text{mol}$ /100g/min, with assumed density of blood = 1.05 g/mL at 310 K (Trudnowski and Rico, 1974).

## 2.9 Voxel-wise analysis

To compare the quality of VSEAN and FLAIR-GESSE data on a voxel-wise basis to ROI-based analyses, maps of OEF and  $R_2'$  values were made for each voxel in the visual ROI. The masks were then further limited to encompass voxels that survived both to create dually-restricted (VSEAN and FLAIR-GESSE restricted) masks for the ROI. The median, mean, and standard deviation of the voxel-wise OEF and  $R_2'$  estimates were calculated for each subject, then averaged across all 17 subjects.

### *2.10 Data and code availability*

The data that support the findings of this study are available from the corresponding author, RBB, upon reasonable request. The data and code sharing adopted by the authors comply with requirements by the National Institutes of Health and the University of California, San Diego, and comply with institutional ethics approval.

## **3. Results**

The following results present mean findings from the visual stimulus ROI (section 2.6.3). Voxelwise findings from the visual ROI and gray matter are described in the Supplementary Materials. Those findings are not significantly different from the mean OEF and  $R_2'$  calculated from the ROI-based method described here.

### *3.1 BOLD/ASL results*

Average CBF and BOLD  $R_2^*$  curves from 17 subjects across the entire 11-min acquisition are plotted in Figure 2. The average fractional change in CBF and BOLD to the



visual stimulus and CO<sub>2</sub> challenge for each subject are plotted in Figure 2A. The average responses of the cohort are summarized in Figure 2B.

### 3.2 VSEAN results

Figure 3 shows the OEF measurements made using VSEAN within the visual ROI plotted against the baseline CBF (Fig. 3A), absolute  $\Delta$ CBF to CO<sub>2</sub> (Fig. 3B), and absolute  $\Delta$ CBF to visual activation (Fig. 3C). Pearson correlation analyses found no significant association with baseline OEF in any of these conditions (Baseline CBF:  $r = -.188$ ,  $p=0.470$ , Cohen's  $d=0.38$ ; Absolute  $\Delta$ CBF to CO<sub>2</sub>:  $r = -.248$ ,  $p=0.336$ ,  $d=0.51$ ;  $\Delta$ CBF to visual activation:  $r = -.054$ ,  $p=0.837$ ,  $d=0.11$ ). The findings in Figs. 3A-C suggest possible sex differences in the CBF measures. Figure 3D summarizes OEF and CBF values of the entire sample, and separately for males and females. A two-way repeated-measures ANOVA revealed a significant main effect of sex ( $F_{1,15}=7.103$ ,  $p=.018$ ,  $d=1.38$ ) with no significant sex by measure interaction ( $F_{3,45}=2.096$ ,  $p=.114$ ,  $d=0.75$ ). Post-hoc analyses showed females had greater baseline CBF and absolute  $\Delta$ CBF to CO<sub>2</sub> than males ( $t_{15} = 3.090$  &  $2.843$ , Bonferonni corrected  $p = .028$  &  $.048$ ,  $d = 1.51$  &  $1.35$ , respectively). No significant sex differences were detected in OEF or absolute  $\Delta$ CBF to visual activation ( $ts < 0.25$ ,  $ps > .810$ ,  $ds < 0.12$ ). Similar effects have been reported previously in work studying regional differences in CBF by sex (Esposito et al., 1996; Gur and Gur, 1990; Rodriguez et al., 1988).

### 3.3 FLAIR-GESSE and M calibration results

Mean measured  $R_2'$  across 17 subjects in the visual ROI was  $3.60 \text{ s}^{-1}$ , with a standard deviation of  $1.39 \text{ s}^{-1}$ , giving a mean value of  $M=0.108 \pm 0.04$  (Figure 4B). The calibrated BOLD analysis of the hypercapnia data yielded an average estimate of  $M = 0.095 \pm 0.05$

(Figure 4B). Figure 4A shows a plot of the individual data for  $M'$  against the value of  $M$  calculated for  $\alpha=0.2$  and  $\beta=1.3$ . We also compared  $M$  and  $M'$  with OEF for each subject and found no statistically significant correlation (see Supplementary Materials for details).  $\delta\text{CMRO}_2$  calculated using individual and group mean  $M$  and  $M'$  are reported in Figure 4C. While individual and group mean  $M'$  values yielded similar  $\delta\text{CMRO}_2$ , individual  $M$  from hypercapnia yielded significantly smaller mean  $\delta\text{CMRO}_2$  than that of the group mean ( $p=0.049$ ).

### 3.4 Absolute $\text{CMRO}_2$ and CBF measurements

The measured data provided the essential information needed to make estimates of absolute CBF and  $\text{CMRO}_2$  in the baseline state and absolute change in CBF and  $\text{CMRO}_2$  to the visual stimulus, thus yielding a complete quantitative picture of underlying physiology. These relationships are shown in Figure 5. The average baseline  $\text{CMRO}_2$ , determined using Eq. [2] and  $\text{OEF}=0.44$  from VSEAN, was calculated to be  $2.58 \pm 0.53$  mM/min, equivalent to approximately  $6.56$  ml/100ml/min =  $6.24$  ml/100g/min =  $258$   $\mu\text{mol}/100\text{ml}/\text{min}$  =  $245.1$   $\mu\text{mol}/100\text{g}/\text{min}$  (see section 2.8 for conversion). The table in Figure 5E shows the mean measured absolute change in  $\text{CMRO}_2$  to the stimulus using  $M'$  values for each subject calculated from  $R_2'$ , based on  $\alpha=0.2$  and  $\beta=1.3$ . Because this estimate depends on the estimate of the fractional  $\text{CMRO}_2$  change, it also depends on the assumed value of  $\beta$ . The absolute  $\Delta\text{CMRO}_2$  to a visual stimulus was estimated to be  $0.21$  mM/min for  $\beta=1.3$ . Figure 5 shows the spread of individual measurements for these parameters. Importantly, in Figures 5A and 5B, the  $x$  and  $y$  axes are not independent measures as the value of baseline  $\text{CMRO}_2$  was calculated from baseline CBF.

## 4. Discussion

This work explored the feasibility of making absolute measurements of CMRO<sub>2</sub> and CBF without requiring the subject to breathe special gases as a first step toward more widespread application of quantitative physiological measurements. While arterial spin labeling (ASL) techniques that do not involve gases are well developed to measure both baseline and fractional change in CBF, CMRO<sub>2</sub> measurement is much more challenging and often involves administration of gases with higher concentrations of O<sub>2</sub> or CO<sub>2</sub>. The main barrier to measuring baseline CMRO<sub>2</sub> is obtaining a measurement of oxygen extraction fraction (OEF), while measuring fractional change in CMRO<sub>2</sub> to a stimulus requires calibration of the blood oxygenation level dependent (BOLD) signal through the factor  $M$ .

The two gas-free techniques tested here present ways to measure those parameters noninvasively. Velocity-selective excitation and arterial nulling (VSEAN) is a technique that leverages relaxation effects of altered hemoglobin O<sub>2</sub>-saturation on the transverse relaxation rate ( $R_2$ ) of venous blood to determine regional OEF. Fluid attenuated inversion recovery – gradient echo sampling of spin echo (FLAIR-GESSE) is a method of estimating the factor  $M$  through measurement of  $R_2'$  that reflects the amount of total deoxyhemoglobin in tissue. We applied these methods to a relatively homogeneous cohort of 17 subjects. Because of the uniformity of the study population, we expected that the physiological parameters were likely to be similar across subjects, and that the variance of the measured values across subjects was thus likely to be dominated by the intrinsic variability of the measurement methods. We took this conservative approach in interpreting the performance of these methods. Our primary findings were: 1) VSEAN yielded a mean value of baseline OEF in the visual ROI of  $0.44 \pm 0.08$ , matching previously reported measurements of extraction (Ibaraki et al., 2007; Ishii et al., 1996; Ito et al., 2004) using positron-emission tomography (PET); and 2) the estimated changes in CMRO<sub>2</sub> in response to the visual stimulus were similar when calculated from  $M'$ , which was

estimated from  $R_2'$  measured with the FLAIR-GESSE method, and when calculated from  $M$  estimated from the hypercapnia response. The ability to obtain a complete quantitative picture of human brain activation, with absolute measures of CBF and  $CMRO_2$  in both baseline and activation states, would be a useful tool for basic studies of brain function and for clinical applications to characterize the effects of disease.

#### *4.1 Baseline $CMRO_2$ with VSEAN OEF measurement*

The VSEAN method is an extension of the seminal method QUIXOTIC for measuring baseline OEF (Bolar et al., 2011), expanding on the basic idea to overcome some limitations of the earlier technique. QUIXOTIC uses a velocity-selective (VS) spin labeling technique, separating venous blood from arterial blood and static tissue. However, the sequence design causes the venous signal to be potentially contaminated by signal contribution from CSF due to diffusion attenuation and to be attenuated by a global inversion pulse. VSEAN addresses these issues by isolating the venous blood signal using a separate arterial nulling module and improves upon the signal to noise of measuring venous  $T_2$  by selective excitation of moving venous spins right before acquisition which allows more time for venous spins to recover, thus yielding a stronger venous signal in comparison to that of QUIXOTIC, where a global inversion pulse attenuates all signal, including venous signal.

Although VSEAN had limited testing in human subjects previously, this is the first study utilizing VSEAN on a larger sample of subjects as part of a complete physiological measurement. The accuracy of the measured mean OEF value over multiple subjects demonstrates its utility as a non-invasive method of estimating baseline  $CMRO_2$ . Mean OEF value across 17 subjects in visual ROI was  $0.443 \pm 0.08$ . These are similar to previously reported OEF values determined using PET. Ishii et al. reported  $OEF=0.413 \pm 6.1$  in the visual cortex; Ibaraki et al. reported  $0.39 \pm 0.05$  in occipital cortex (Ibaraki et al., 2007; Ishii et al.,

1996). The absolute baseline  $CMRO_2$  calculations were  $2.58 \pm 0.53$  mM/min (approximately 6.56 ml/100 ml/min) for visual ROI. This is higher than previously reported PET values for baseline  $CMRO_2$ ; Ishii et al. reported  $4.36 \pm 1.03$  ml/100ml/min in visual cortex, while Ibaraki et al. reported  $4.3 \pm 0.7$  ml/100ml/min in occipital cortex (Ibaraki et al., 2007; Ishii et al., 1996). Part of this difference is most likely due to a higher baseline CBF in our study due to the active baseline. Baseline CBF was determined to be  $72.7 \pm 11.8$  ml/100ml/min in visual ROI. This is compared to  $66.1 \pm 12.9$  in visual cortex (Ishii et al., 1996), or  $58 \pm 11$  ml/100ml/min in occipital cortex (Ibaraki et al., 2007), as reported previously. In addition, we observed a striking difference in the CBF between our female and male subjects, and considering the large effect size equaling 1.5 standard deviations, we feel confident in concluding that female CBF is greater than male CBF overall. While a difference in hematocrit between males and females could affect blood  $T_2^*$  and thus produce an artefactual difference in the ASL measurements, the data here were collected with a short echo time that minimized such an effect (< 2%).

Interestingly, the correlation between baseline OEF and baseline CBF was weak (i.e., small effect) and nonsignificant. This would be consistent with the idea that a baseline OEF around 40% is in some sense optimal, and that across subjects, baseline CBF adjusts to produce this OEF for the  $CMRO_2$  demands of the individual. The distribution of OEF measurement across the group was thus much tighter than CBF measurements, which has been documented previously using other techniques (Raichle et al., 2001). Additionally, the variance observed is reflective of the variance in measurement technique combined with true variance across subjects. Because of the uniformity of the subject population, we did not expect large physiological variations in OEF across the subject pool. We thus could assume that the variance observed is dominated by the variance in measurement technique. The variance across subjects in measuring OEF with VSEAN compared to the variance using PET

measurements was similar, or even better, depending on the study, as noted above. VSEAN could thus be a comparable technique to utilize that does not require the invasiveness of PET.

At this point, further development of these techniques will allow clinical researchers to assess how regional metabolism is altered in disease states. VSEAN would be a useful tool in using group mean results to determine changes in  $CMRO_2$  in pathophysiology. Studies of human development, healthy aging, and disease would benefit from being able to assess group differences in baseline  $CMRO_2$ . A subsequent paper will address the utility of individual and group OEF measurements in detecting  $CMRO_2$  change in a single subject after significant alteration with drug administration.

Potential limitations of VSEAN include (1) low signal-to-noise (SNR) in certain voxels and (2) measurements that rely on a calibration curve developed using *ex vivo* bovine blood. With regards to (1) low SNR, multi-echo spin echo measurements allow for higher temporal resolution and efficiency, but the accuracy of the  $T_2$  measurement may be affected by flow artifacts through the multi-echo gradients echo-refocusing effects, and wash-out effects (Guo and Wong, 2012). To combat this, OEF is not calculated on a voxel-wise basis, and instead a  $T_2$  fit is calculated for the average signals for each echo across a pre-defined mask. To address (2) the use of an *ex vivo* bovine blood calibration curve, while a  $T_2$ -Y calibration curve has been published using human blood samples by Lu and colleagues (Lu et al., 2012), this curve was not used due to a different  $T_2$ -preparation module (hard composite pulses vs. BIR-4 based), a different way of modulating eTEs (increasing the number of pulse modules vs. increasing the gap in the module), and its limited range. The authors noted that the relevant oxygenation range for venous blood, 0.5-0.75, was not tested (Lu et al., 2012); since VSEAN was developed specifically to measure blood oxygenation at those lower levels, the calibration curve using human blood was forgone for the Zhao curve that has a range of 0.39-1.00 for Hct=0.44.

#### 4.2 $\Delta\text{CMRO}_2$ from FLAIR-GESSE $R_2'$ - $M$ calibration

Like VSEAN, previous studies have not evaluated FLAIR-GESSE to quantify  $\text{CMRO}_2$  in a large sample of subjects. Here, we assumed the ideal relationship  $M' \cong \text{TE} \bullet R_2'$  to calculate  $M'$  values that we then used to calculate  $\delta\text{CMRO}_2$  to a stimulus. An interesting aspect of our findings is the apparent difference in the relationship of baseline CBF to  $\text{CMRO}_2$  versus in response to visual activation (Figs. 5A and 5B). We did not find a significant relationship between CBF and  $\text{CMRO}_2$  in the baseline condition (Fig. 5A); however, the medium effect size of the relationship (Cohen's  $d = 0.97$ ) suggests it would achieve significance with a slightly larger sample. In contrast, there was no ambiguity in the strength of the positive relationship between CBF and  $\text{CMRO}_2$  in response to visual activation (Fig. 5B), which was a very large and significant effect ( $d = 5.23$ ). Overall, our results provide clear evidence for a physiologic difference in the coupling of flow and metabolism at baseline versus with activity. At baseline, the coupling is modest, whereas there is tight coupling during activation.

Empirically, our group estimate of  $M'$  closely resembled the  $M$  calculated from a hypercapnia experiment, with  $\alpha=0.2$  and  $\beta=1.3$ . However, both  $M$  and  $M'$  depend on assumptions employed in the modeling that complicate direct physiological interpretation of these parameters (Simon et al., 2016). The value of  $M$  estimated from a hypercapnia experiment depends on the version of the BOLD model used for the analysis, specifically the assumption of values for  $\alpha$  and  $\beta$ , and also the assumption that there is no  $\text{CMRO}_2$  change with hypercapnia. For the newer method, the estimate of  $R_2'$  may depend on the acquisition technique and analysis, because the signal decay described by  $R_2'$  is not a simple mono-exponential decay. Furthermore, theoretical modeling suggests that  $M$  is expected to be larger than  $M'$  due to diffusion and other BOLD effects associated with activation that are not captured by baseline  $R_2'$ , such as blood volume changes or intravascular signal changes (Blockley et al.,

2015). In practice, uncorrected field distortions, particularly near the edges of the brain where field distortions are likely to be the most nonlinear (Dickson et al., 2010), would tend to make larger estimates of  $R_2'$  and thus  $M'$ . In short, whether one is using  $M'$  or  $M$  to calibrate a BOLD/ASL experiment and measure  $CMRO_2$ , one needs to be mindful of the potential for systematic effects on accuracy due to the modeling assumptions and acquisition methods. Further work is needed to clarify these relationships.

As a test of the statistical properties of the standard hypercapnia method and the newer  $R_2'$  method, we compared the distributions of  $\delta CMRO_2$  values across the population estimated in two ways: first, using the individually measured values of  $M$  or  $M'$ , and second, with the assumption that each subject's value of  $M$  or  $M'$  was the same and equal to the group mean value. The rationale for this comparison is that in general we expect that true variation of the physiological effects modeled by  $M$  would lead to increased variance of the  $\delta CMRO_2$  values estimated across a population, if not taken into account, and use of individual measurements of  $M$  should then reduce the variance of  $\delta CMRO_2$  compared to using a constant value of  $M$  for all subjects. However, if there is significant random error in the measurement of  $M$ , and the true physiological range of the physiological parameters across the population is narrow, using individual  $M$  values could increase the range of estimated  $\delta CMRO_2$  across the population due to that random error. A conservative assumption is that the physiological factors that determine  $M$  and  $\delta CMRO_2$  to the stimulus are relatively uniform across our sample of young, healthy control subjects, and thus the observed variance of the estimates of  $\delta CMRO_2$  across the population is likely a reflection of measurement error of  $M$ . The mean and standard deviation of the estimates of  $\delta CMRO_2$  calculated using individual  $M'$  values closely matched changes calculated using the group mean  $M'$ , consistent with this assumption and only a small role of random error of individual  $M'$  estimates. However, for the hypercapnia data the same comparison showed that



the distribution  $\delta\text{CMRO}_2$  estimates from individual  $M$  values had a mean reduced by more than a factor of two, which may be due to the interaction of noisy signals with the nonlinearity of the calculation of  $M$  using Eq [1]. In addition, the variance increased by about a factor of two compared with the  $\delta\text{CMRO}_2$  distribution estimated from the group mean  $M$ , consistent with high variability of the individual  $M$  measurements. It may be that the higher variance of  $\delta\text{CMRO}_2$  estimates with individual  $M$  values is due to our method of  $\text{CO}_2$  administration, and it is possible that real-time end-tidal forcing could yield more consistent results on an individual basis. However, dedicated equipment to enable end-tidal forcing further restricts the application of quantitative physiology methods to dedicated research laboratories, supporting the push to work toward replacing gas-based techniques with gas-free based techniques.

Finally, it is important to note that  $R_2'$  measurements, like the OEF measurements with VSEAN, may be most useful in fMRI studies of development, aging and disease in which different groups are compared. For example, a different mean  $R_2'$  for children and adults in the brain region associated with performing a particular task could indicate that a difference in the BOLD response between the two groups should be interpreted with caution; the BOLD response difference may reflect a difference in baseline conditions rather than a difference in neural activity. Even if there is uncertainty about the exact relationship between  $M$  and  $M'$ , as discussed above, simply normalizing the BOLD response by the mean  $R_2'$  for the group would remove the baseline dependence, and any remaining difference between the two groups could be interpreted as due to differences in the  $\text{CMRO}_2$  and CBF responses to the stimuli. If the CBF response also is measured, this will enable interpretation of whether the  $\text{CMRO}_2$  response is different in the two groups based on the measured  $R_2'$ .

#### *4.3 Voxel-wise versus basic ROI-wise analyses*

Our primary analysis of the data focused on a functionally localized ROI in visual cortex. In this approach, all the raw data for voxels within the ROI were first pooled before calculating the physiological variables. That is, fractional CBF and BOLD responses were calculated after pooling the raw voxel data, and OEF and  $R_2'$  were calculated after pooling the raw data for voxels within the ROI. This approach was used to provide a basic proof of concept of estimating absolute physiological parameters for both baseline and activation states. In principle, this approach could be extended to voxel-wise analysis, although this will require further developmental work. There are two central problems: 1) the VSEAN measurement suffers from poor estimation of  $R_2$  when the signal to noise ratio is low; and 2) the  $R_2'$  measurement is likely to be positively biased in regions where large-scale field correction is incomplete. For this reason, not every voxel in the visually activated ROI and GM masks may contain accurate information on OEF and  $R_2'$ . As a first step in beginning to extend these measurements to individual voxels, we chose limits on the quality of fit of  $R_2$  in the VSEAN experiment and on the range of  $R_2'$  as markers of data of sufficient quality to make an estimate of the associated parameter for that voxel. We then tested how many of the voxels chosen to be in the visual cortex ROI based on the activation data also had good quality estimates of OEF and  $R_2'$ . While a relatively large fraction of ROI voxels had a full set of measurements, there is clearly room for more work to improve the robustness of these measurements. Importantly, when we performed individual voxel analyses on just these voxels and then averaged over the calculated values, the basic physiological parameter estimates were similar to the ROI-approach of first pooling the data: the mean or median derived from voxel-wise analysis were not statistically different from the mean OEF and  $R_2'$  derived using the basic visual ROI mask. In the future, simply using a visual ROI determined from the functional localizer and GM mask from the ASL flow data may be enough to make representative estimates of OEF and  $M$ .

#### 4.4 Physiological results

The primary goal of this work was to begin to evaluate methods for making quantitative physiological measurements without requiring the subject to breathe special gas mixtures. To that end, a homogeneous group of young adult subjects was studied, and we did not expect there to be large physiological variation across subjects. We found no statistically significant correlations between baseline OEF and baseline CBF, nor between baseline OEF and  $M$  or  $M'$ . Further work is needed to test these methods in a wider range of subjects where more physiological variation could be expected. Looking at sex differences in the measured physiological parameters, we found baseline CBF to be significantly higher in females compared to males by about 22%. One of the potential advantages of a fully quantitative assessment of CBF and  $CMRO_2$  in both the baseline and activation states is that we can examine absolute changes to a stimulus in addition to the more commonly measured fractional changes. In comparing absolute baseline values of CBF and  $CMRO_2$  and absolute changes in these quantities to the stimulus, we found a different slope (Figure 5A and 5B). This suggests that different physiological mechanisms may serve to balance baseline CBF/ $CMRO_2$  coupling and activation CBF/ $CMRO_2$  coupling, although more work is needed to define these mechanisms.

#### 5. Conclusions

The results from this work demonstrate the potential for making absolute  $CMRO_2$  measurements without requiring the subject to breathe special gases. However, work is still needed to refine these methods and establish their validity. Each method has its own challenges: for VSEAN, low SNR of the isolated blood signal for some voxels, and for FLAIR-GESSE, excessive field distortion near edges of the brain. Nevertheless, these results support

the feasibility of painting a more complete picture of brain physiology, in absolute terms, during both baseline and activation states, with the potential of providing a deeper probe of neural activity in the human brain.

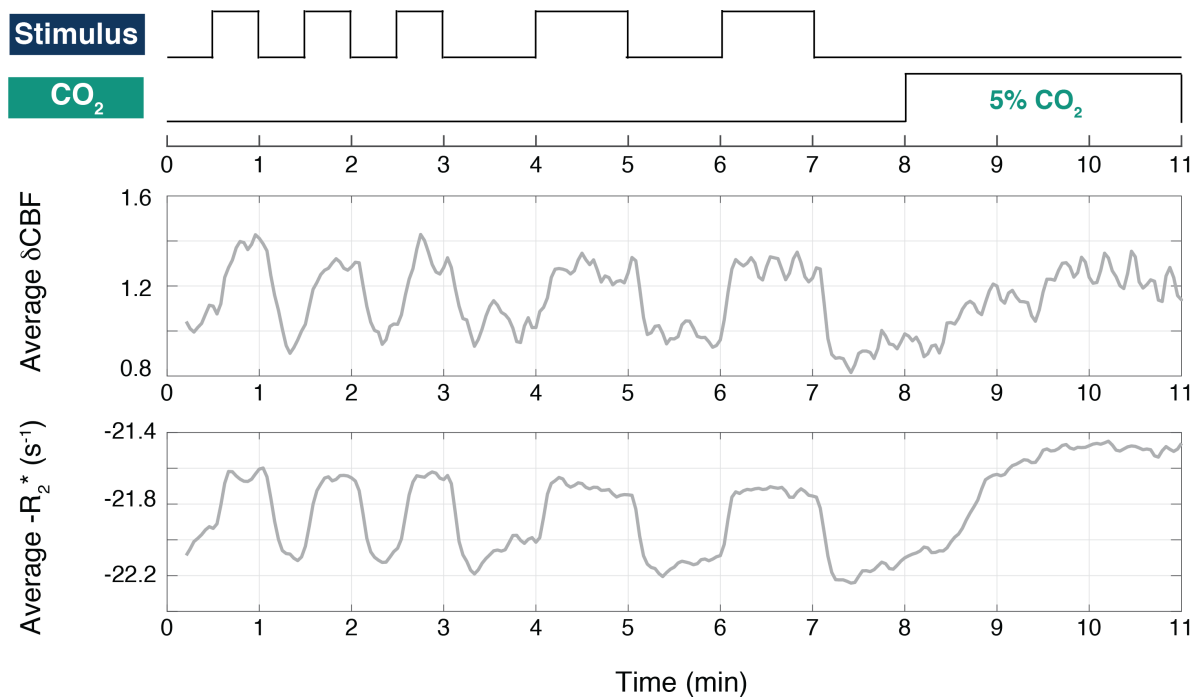

**Figure 1: Experimental set-up, CBF and  $R_2^*$  data.** Top panel shows experimental set-up of PICORE QUIPSS II BOLD/ASL acquisition with visual stimuli of a 6 Hz flickering checkerboard (“Stimulus”) and 5% CO<sub>2</sub> administration. Middle and bottom panels illustrate average CBF and BOLD  $R_2^*$  curves across 17 subjects. The CBF is normalized to the baseline CBF, and thus is dimensionless. The BOLD  $R_2^*$  curve is plotted as  $-R_2^*$  for more visibly intuitive purposes.

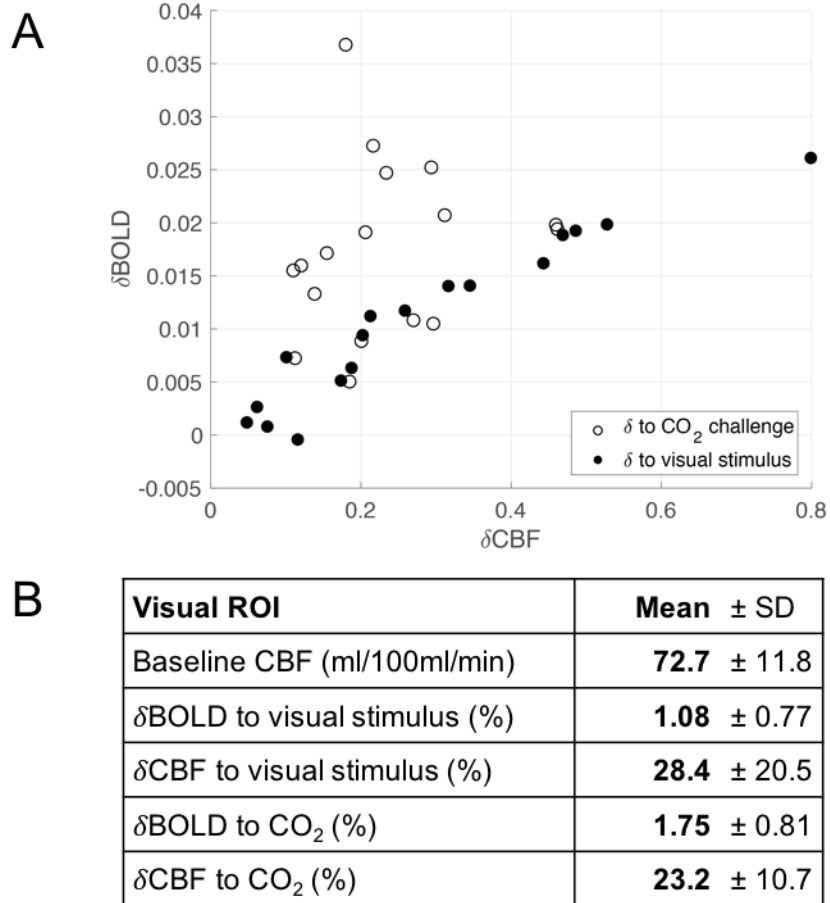

**Figure 2: Visual activation and calibrated BOLD results.** (A) Scatter plot of fractional CBF versus fractional BOLD change to the visual stimulus and CO<sub>2</sub> challenge for each subject in the visual ROI only. (B) Mean and standard deviation of δBOLD and δCBF to visual stimulus experiment in normoxia/normocapnia across seventeen subjects, and mean changes to CO<sub>2</sub> challenge in the baseline state, across all subjects.

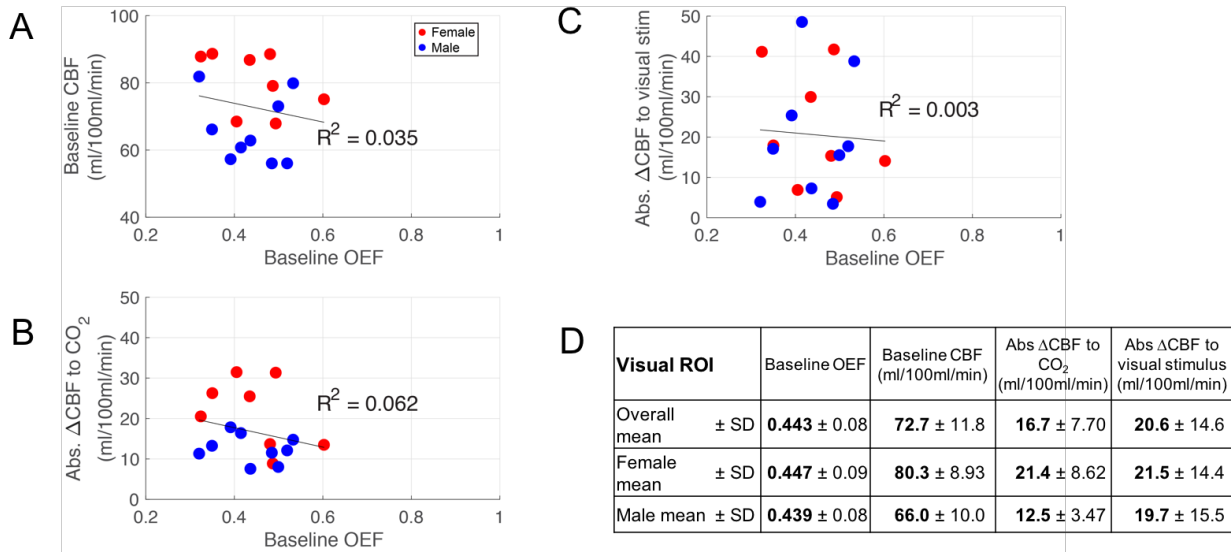

**Figure 3: VSEAN results.** (A) Independent VSEAN and ASL methods show variation of measured baseline OEF and CBF across subjects in the visually stimulated ROI. (B) Variation of OEF to absolute  $\Delta$ CBF to  $\text{CO}_2$  are plotted for ROI, and (C) variation across subjects versus absolute  $\Delta$ CBF to visual stimulus in the visual ROI. (D) Table of baseline OEF, baseline CBF, absolute  $\Delta$ CBF to  $\text{CO}_2$ , and absolute  $\Delta$ CBF to visual stimulus in visual ROI. There was no correlation between OEF and baseline CBF or to any absolute  $\Delta$ CBF. There was a significant and large effect size difference in baseline CBF between male (blue) and female (red) ( $p=0.007$ , Cohen's  $d = 1.5$ ).

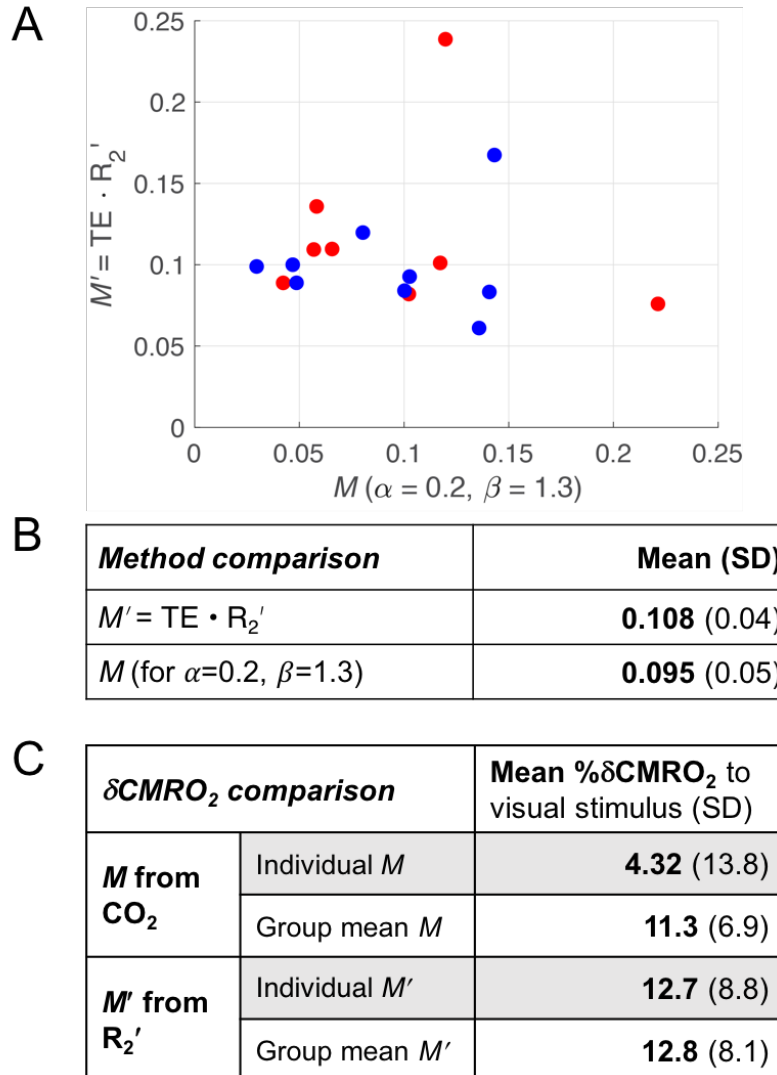

**Figure 4: FLAIR-GESSE versus calibrated BOLD results.** (A)  $M$  from calibrated-BOLD experiment with  $\alpha=0.2$ ,  $\beta=1.3$ , and  $M'$  from FLAIR-GESSE's  $R_2'$  for each of 17 subjects in the visual ROI. Scatterplot demonstrates range and variance of measurements of  $M$  from the two methods. (B) Average  $M'$  was calculated from mean measured  $R_2'$  value across 17 subjects using FLAIR-GESSE of  $3.60 \pm 1.39 \text{ s}^{-1}$ , with  $TE = 0.03 \text{ s}$ .  $M$  values were calculated from calibrated BOLD  $CO_2$  experiment. (C) Fractional  $\delta CMRO_2$  to visual stimulus calculated using Eq. [1] and  $\delta CBF$  and  $\delta BOLD$  to the visual stimulus, as well as the  $M$  and  $M'$  values. Two calculations were performed, one using each subject's individual  $M$  or  $M'$  value to calculate individual  $\delta CMRO_2$ , then averaged across all subjects; the other method utilized the group mean  $M$  or  $M'$  to calculate individual  $\delta CMRO_2$ , then averaged across the subjects.



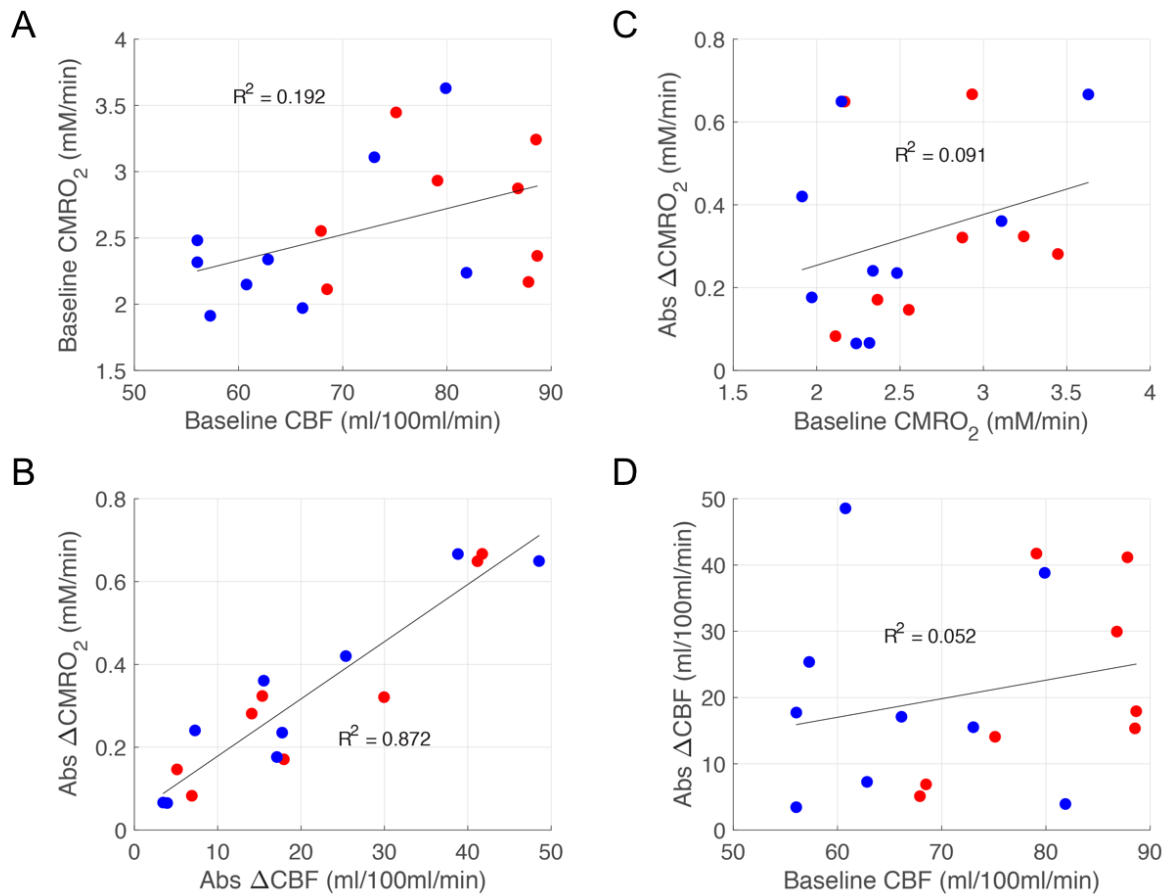

**E**

| Visual ROI                 | Mean baseline $\pm$ SD | Mean abs $\Delta$ to visual stimulus $\pm$ SD |
|----------------------------|------------------------|-----------------------------------------------|
| CBF (ml/100ml/min)         | 72.7 $\pm$ 11.8        | 20.6 $\pm$ 14.6                               |
| CMRO <sub>2</sub> (mM/min) | 2.58 $\pm$ 0.53        | 0.21 $\pm$ 0.15                               |

**Figure 5: Baseline and absolute changes in CMRO<sub>2</sub> and CBF across subjects in visual ROI.** Absolute calculations of CMRO<sub>2</sub> at baseline and to a visual stimulus non-invasively determined using OEF and *M* calibration data acquired from VSEAN and FLAIR-GESSE, with  $\alpha=0.2$  and  $\beta=1.3$ . (A) Absolute CBF and CMRO<sub>2</sub> in the baseline state (slope=0.020,  $r=0.438$ ,  $p=0.079$ , Cohen's  $d = 0.97$ ). (B) Absolute CBF and CMRO<sub>2</sub> changes in response to the visual stimulus (slope=0.014,  $r=0.934$ ,  $p<0.00001$ ,  $d = 5.23$ ). Note that x- and y-axes are not independent in A or B as CMRO<sub>2</sub> estimates are calculated from CBF. (C) Absolute  $\Delta$ CMRO<sub>2</sub> change to visual stimulus versus baseline CMRO<sub>2</sub>. Change in CMRO<sub>2</sub>, based on fractional change of BOLD and CBF to visual stimulus, was calculated independently of baseline CMRO<sub>2</sub>, which is dependent on baseline CBF and an independent VSEAN measurement of OEF. The change in CMRO<sub>2</sub> was calculated using *M'* from individual  $R_2'$  (slope=0.091,  $r=0.302$ ,  $p=0.079$ ,  $d = 0.0.63$ ). (D) Absolute  $\Delta$ CBF change to visual stimulus versus baseline CBF. Measurements are independent; baseline CBF was calculated based on the CSF calibration scan, while  $\Delta$ CBF was estimated from ASL data with visual stimulus onset (slope=0.052,  $r=0.228$ ,  $p=0.379$ ,  $d = 0.47$ ). (E) Mean baseline and absolute change estimates for CMRO<sub>2</sub> and CBF.

## Supplementary Material

### *S1. Voxel-wise VSEAN analysis results*

For VSEAN, on average 87 +/- 8.6% of voxels from the visually activated ROI had an OEF value properly fitted, whereas 72 +/- 17% of voxels from the gray matter mask had an OEF value (Figure S1). There may be voxels in the ROI that do not have reliable OEF calculations on an individual basis; these may be present as outliers that skew the mean OEF calculated by averaging across the voxels. As a result, the median value of the spread of OEF values across the ROI may be a more accurate representation of the ROI. The median, mean, and standard deviations were calculated for each individual subject's ROI. The average of those medians, means, and standard deviations across the 17 subjects are summarized in Table S1. These values can be compared to the basic ROI-wise calculation (Figure 3D), for which the mean OEF for the visual ROI was 0.443. The results from the voxel-wise calculation of OEF in the dually-restricted masks are shown to be lower than that of ROI-wise calculations, but the difference is not significant (for Visual ROI:  $p=0.52$  for difference between ROI-wise means and voxel-wise means;  $p=0.37$  for difference between ROI-wise means and voxel-wise medians. For GM:  $p=0.54$  for difference between ROI-wise means and voxel-wise means;  $p=0.33$  for difference between ROI-wise means and voxel-wise medians).

In addition to noisy voxels potentially skewing the fitting of  $T_2$ , another source of error could be the  $T_2$ -Y curve used to fit  $T_2$  to blood oxygenation saturation. The curve used was collected from bovine blood *in vitro* at 3T (Zhao et al., 2007). The transverse relaxation rates  $R_2$  and  $R_2^*$  for blood samples of varying hematocrit (Hct) levels were measured under conditions mimicking physiological state using single spin echo and gradient echo sequences. The curve corresponding to a hematocrit level of 0.44 is used in the VSEAN analysis, which is a reasonable assumption for both females and males, as a Hct = 0.42 was assumed for females

and Hct = 0.47 was assumed for males. Despite the careful setup and considerations of the authors, the resulting  $T_2$ -Y curve could still be influenced by the use of bovine blood with sodium citrate, which would differ from human blood, although the authors note that bovine erythrocytes are very similar to human erythrocytes in physical properties such as size, shape, and water permeability. The authors also point out that measuring  $R_2^*$  in their experimental setup would have smaller field inhomogeneities than measuring  $R_2^*$  in tissue, so the results from their method should be considered lower than physiological numbers. The VSEAN method could thus be benefited in future experiments from a  $T_2$ -Y calibration curve that is derived from human blood samples using similar MR acquisition parameters, in conditions as similar to blood *in situ* as possible.

## S2. Voxel-wise $R_2'$ analysis results

FLAIR-GESSE's limitations are also demonstrated by the voxel-wise analysis. Excessive field distortion near the edges and due to macroscopic field inhomogeneities can present a problem in adequately correcting the measurements, leading to very high  $R_2'$  measurements skewing average data. To look at the spread of  $R_2'$  estimates across ROI and GM, FLAIR-GESSE data were analyzed on a voxel-by-voxel basis. While the pathway does not inherently limit the assignment of  $R_2'$  value to each voxel, a generous restriction of  $0 - 10 \text{ s}^{-1}$  was applied post- $R_2'$  voxel-wise calculations, independent of the mean  $R_2'$  value or the spatial spread of  $R_2'$  across the slice. These restricted FLAIR-GESSE masks had on average 88 +/- 12% of voxels from basic visual ROI and 80 +/- 7% of voxels from the full GM mask (Figure S1A). Restricted masks were then combined with VSEAN-restricted masks to form the dually-restricted mask as described above. The mean  $R_2'$  across the dually-restricted mask was calculated for each subject; however, as before, because certain voxels may contain erroneous estimates due to

field distortions or inhomogeneities leading to high  $R_2'$  values that would skew the mean, the median of each mask was also calculated (Table S1). These values were compared to the original, ROI-based mean  $R_2'$  calculated,  $3.60 \pm 1.39 \text{ s}^{-1}$  for ROI and  $3.37 \pm 0.7 \text{ s}^{-1}$  for GM. The results from the voxel-wise calculation of  $R_2'$  in the dually-restricted masks appear to be higher than that of ROI-wise calculations, but the difference is not significant (for Visual ROI:  $p=0.65$  for difference between ROI-wise means and voxel-wise means;  $p=0.92$  for difference between ROI-wise means and voxel-wise medians. For GM:  $p=0.18$  for difference between ROI-wise means and voxel-wise means;  $p=0.83$  for difference between ROI-wise means and voxel-wise medians).

### *S3. M, M', and other physiological variables*

While there was not a strong correlation between  $M$  derived from hypercapnia and  $M'$  from  $R_2'$ , the values for each subject were also compared to baseline OEF measurements using VSEAN and to baseline CBF measurements from ASL to provide insight into whether the variance in each of these measurements across subjects is dominated by real physiological variability or technical limitations in acquisition. In Figure S2A, baseline OEF is compared to  $M$  and  $M'$ ; given a large range of  $M$  and OEF values, one could predict that  $M$  should correlate with OEF due to both variables' relation to the amount of deoxyhemoglobin available for oxygenation. For both  $M$  and  $M'$ , no significant correlation was seen in the ROI. Given the young, healthy population studied, a wide range of OEF values was not expected; as a result, a trend in this group would not be reasonably seen. Figure S2B shows baseline CBF compared to  $M$  and  $M'$ , and again there is no significant correlation seen in the ROI. Thus, in comparing  $M$  from hypercapnia versus  $R_2'$ , we cannot comment on which technique is more sensitive to physiological differences across subjects.

**Table S1: Voxel-wise analysis statistics.** The median, mean, and standard deviation of OEF and  $R_2'$  were calculated across the dually-restricted ROI mask for each subject; the average of those statistics in 17 subjects are tabulated here. The right-most column shows the ROI-based mean used in the primary analyses for reference.

| <b>OEF</b>                                     | <i>Median</i> | <i>Mean</i> | <i>SD</i> | <i>Mean ROI-based (from above)</i> |
|------------------------------------------------|---------------|-------------|-----------|------------------------------------|
| <i>ROI</i>                                     | 0.418         | 0.424       | 0.19      | 0.443                              |
|                                                |               |             |           |                                    |
| <b><math>R_2'</math> (<math>s^{-1}</math>)</b> | <i>Median</i> | <i>Mean</i> | <i>SD</i> | <i>Mean ROI-based (from above)</i> |
| <i>ROI</i>                                     | 3.65          | 3.80        | 1.85      | 3.60                               |

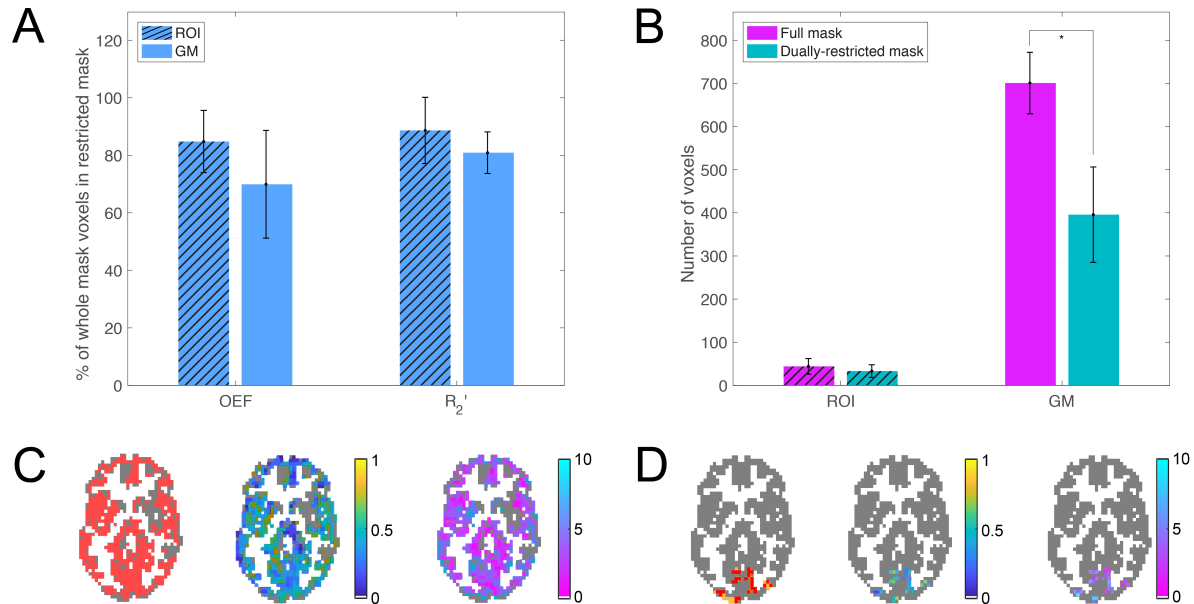

**Supplemental Figure S1: Voxel-wise calculation of OEF and  $R_2'$ .** (A) Percentage of whole mask (ROI or GM) voxels that survived VSEAN or FLAIR-GESSE analysis for OEF or  $R_2'$ . The restricted masks for each comprise voxels that exhibited good fit of  $T_2$  for OEF, or were in a physiologically relevant range of  $R_2'$  (lower limit of 0, higher limit of 10). For VSEAN, on average  $87 \pm 8.6\%$  of voxels from the visually activated ROI and  $72 \pm 17\%$  of voxels from the gray matter mask had an OEF properly fitted. For FLAIR-GESSE,  $88 \pm 12\%$  of voxels from visual ROI and  $80 \pm 7\%$  of voxels from GM survived  $R_2'$  restriction. The restricted masks for each method were then combined into a dually-restricted mask of voxels that have a measurement for both OEF and  $R_2'$ . (B) The average total number of voxels in the combined, dually-restricted masks for ROI and GM versus the total number of voxels in the full masks for 17 subjects. The ROI voxels for the full mask were not significantly different from that of the dually-restricted mask ( $p=0.062$ ) while the GM voxels for the full mask were significantly different from that of the dual-restricted mask ( $p<0.00001$ ). (C,D) Brain masks depict one representative subject. (C) Left panel: Red voxels show the dually-restricted GM mask superimposed on the full gray matter mask, depicted in charcoal. Center panel: Voxel-wise OEF estimates for the dually-restricted GM mask (mapped in color with reference to color bar on the right), superimposed on full gray matter mask in charcoal. Right panel: Voxel-wise  $R_2'$  estimates for dually-restricted GM mask (mapped in color with reference to color bar on the right), superimposed on full gray matter mask in charcoal. (D) Left panel: Mustard voxels show the basic visually-stimulated ROI, with dually-restricted ROI superimposed in red. Charcoal voxels depict full gray matter mask. Center panel: Voxel-wise OEF estimates for dually-restricted ROI mask (mapped in color with reference to color bar on the right), superimposed on full gray matter mask in charcoal. Right panel: Voxel-wise  $R_2'$  estimates for dually-restricted ROI mask (mapped in color with reference to color bar on the right), superimposed on full gray matter mask in charcoal.

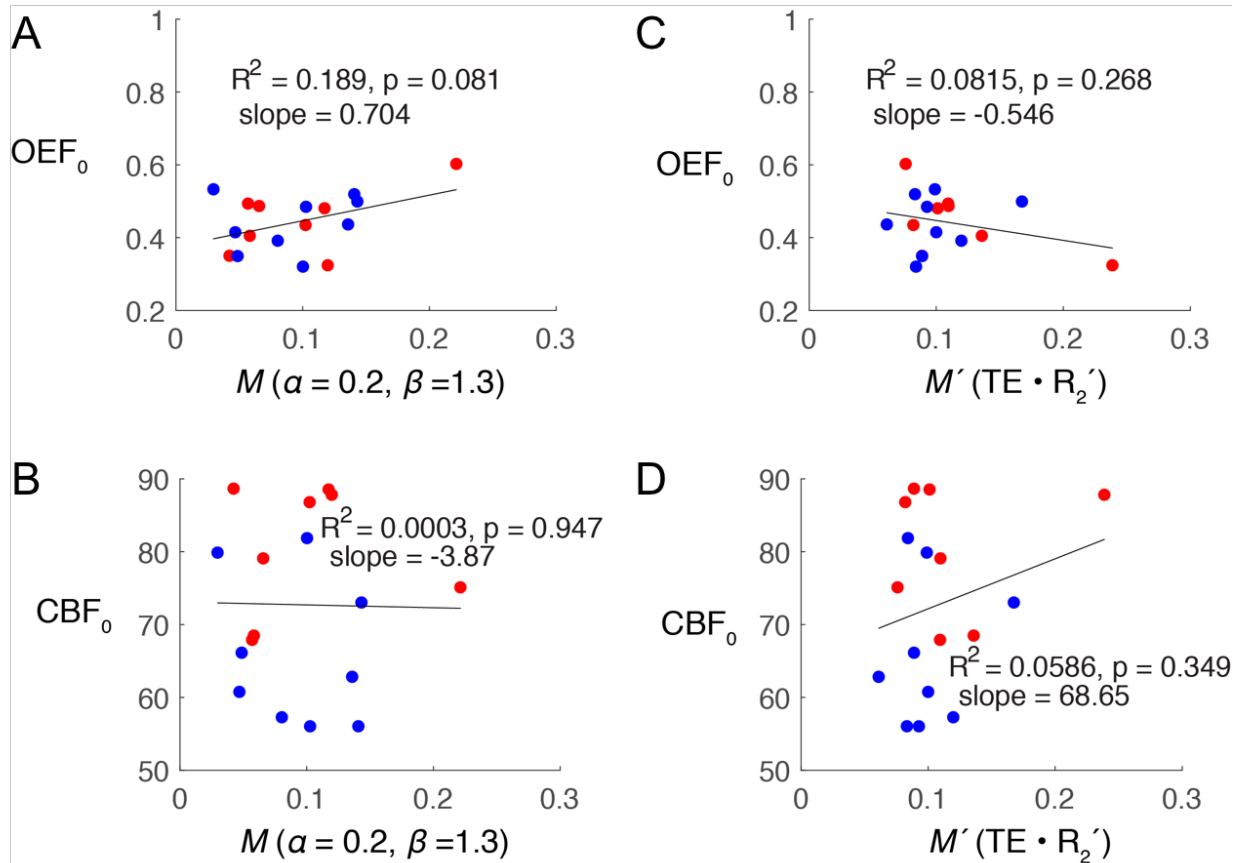

**Supplemental Figure S2: OEF<sub>0</sub> versus  $M$  from hypercapnia and FLAIR-GESSE.** (A) Left: Baseline OEF versus  $M$  from hypercapnia. Right: Baseline OEF versus  $M'$ , derived from  $R_2'$ . (B) Left: Baseline CBF versus  $M$  from hypercapnia. Right: Baseline CBF versus  $M'$ , derived from  $R_2'$ . None of the correlations meet significance.

## References

- Alsop, D.C., Detre, J.A., Golay, X., Günther, M., Hendrikse, J., Hernandez-Garcia, L., Lu, H., Macintosh, B.J., Parkes, L.M., Smits, M., Van Osch, M.J.P., Wang, D.J.J., Wong, E.C., Zaharchuk, G., 2015. Recommended implementation of arterial spin-labeled Perfusion mri for clinical applications: A consensus of the ISMRM Perfusion Study group and the European consortium for ASL in dementia. *Magn. Reson. Med.* 73, 102–116. <https://doi.org/10.1002/mrm.25197>
- Blockley, N.P., Griffeth, V.E.M., Simon, A.B., Dubowitz, D.J., Buxton, R.B., 2015. Calibrating the BOLD response without administering gases: Comparison of hypercapnia calibration with calibration using an asymmetric spin echo. *Neuroimage* 104, 423–429. <https://doi.org/10.1016/j.neuroimage.2014.09.061>
- Blockley, N.P., Stone, A.J., 2016. Improving the specificity of R2' to the deoxyhaemoglobin content of brain tissue: Prospective correction of macroscopic magnetic field gradients. *Neuroimage* 135, 253–260. <https://doi.org/10.1016/j.neuroimage.2016.04.013>
- Bolar, D.S., Rosen, B.R., Sorensen, A.G., Adalsteinsson, E., 2011. QUantitative Imaging of eXtraction of oxygen and Tissue consumption (QUIXOTIC) using venular-targeted velocity-selective spin labeling. *Magn. Reson. Med.* 66, 1550–1562. <https://doi.org/10.1002/mrm.22946>
- Boynton, G.M., Engel, S.A., Glover, G.H., Heeger, D.J., 1996. Linear systems analysis of functional magnetic resonance imaging in human V1. *J. Neurosci.* 16, 4207–21.
- Brainard, D.H., 1997. The Psychophysics Toolbox. *Spat. Vis.* 10, 433–436. <https://doi.org/10.1163/156856897X00357>
- Bulte, D.P., Kelly, M., Germuska, M., Xie, J., Chappell, M. a., Okell, T.W., Bright, M.G., Jezzard, P., 2012. Quantitative measurement of cerebral physiology using respiratory-calibrated MRI. *Neuroimage* 60, 582–591. <https://doi.org/10.1016/j.neuroimage.2011.12.017>
- Buxton, R.B., 2013. The physics of functional magnetic resonance imaging (fMRI). *Reports Prog. Phys.* 76, 096601. <https://doi.org/10.1088/0034-4885/76/9/096601>
- Buxton, R.B., 2010. Interpreting oxygenation-based neuroimaging signals: the importance and the challenge of understanding brain oxygen metabolism. *Front. Neuroenergetics* 2, 1–16. <https://doi.org/10.3389/fnene.2010.00008>
- Buxton, R.B., Griffeth, V.E.M., Simon, A.B., Moradi, F., 2014. Variability of the coupling of blood flow and oxygen metabolism responses in the brain: a problem for interpreting BOLD studies but potentially a new window on the underlying neural activity. *Front. Neurosci.* 8, 1–6. <https://doi.org/10.3389/fnins.2014.00139>
- Chalela, J. a, Alsop, D.C., Gonzalez-Atavales, J.B., Maldjian, J. a, Kasner, S.E., Detre, J. a, 2000. Magnetic resonance perfusion imaging in acute ischemic stroke using continuous arterial spin labeling. *Stroke.* 31, 680–687. <https://doi.org/10.1161/01.STR.31.3.680>
- Chen, J.J., Pike, G.B., 2009. BOLD-specific cerebral blood volume and blood flow changes during neuronal activation in humans. *NMR Biomed.* 22, 1054–1062. <https://doi.org/10.1002/nbm.1411>
- Cox, R.W., 1996. AFNI: software for analysis and visualization of functional magnetic resonance neuroimages. *Comput. Biomed. Res.* 29, 162–73. <https://doi.org/10.1006/cbmr.1996.0014>
- Crawford, A., Adesanya, A., 2010. Interpretation of Arterial Blood Gases [WWW Document]. *Pocket ICU Manag.* URL [https://anesth.unboundmedicine.com/anesthesia/view/Pocket-ICU-Management/534207/all/Interpretation\\_of\\_Arterial\\_Blood\\_Gases#2](https://anesth.unboundmedicine.com/anesthesia/view/Pocket-ICU-Management/534207/all/Interpretation_of_Arterial_Blood_Gases#2)
- Davenport, H.W., 1974. *The ABC of acid-base chemistry: the elements of physiological blood-gas chemistry for medical students and physicians.* University of Chicago Press.



- Davis, T.L., Kwong, K.K., Weisskoff, R.M., Rosen, B.R., 1998. Calibrated functional MRI: mapping the dynamics of oxidative metabolism. *Proc. Natl. Acad. Sci. U. S. A.* 95, 1834–1839. <https://doi.org/10.1073/pnas.95.4.1834>
- Dickson, J.D., Ash, T.W.J., Williams, G.B., Harding, S.G., Carpenter, T.A., Menon, D.K., Ansorge, R.E., 2010. Quantitative BOLD: the effect of diffusion. *J. Magn. Reson. Imaging* 32, 953–961. <https://doi.org/10.1002/jmri.22151>
- Esposito, G., Horn, J. Van, Weinberger, D.R., Berman, K.F., 1996. Gender differences in cerebral blood flow as a function of cognitive state with PET. *J. Nucl. ...* 37, 559–64.
- Fraser, M., Haldeman-Englert, C., 2017. Hemoglobin [WWW Document]. UC San Diego Heal. Libr. URL <http://myhealth.ucsd.edu/RelatedItems/167,hemoglobin>
- Gagnon, L., Sakad i, S., Lesage, F., Musacchia, J.J., Lefebvre, J., Fang, Q., Yucel, M.A., Evans, K.C., Mandeville, E.T., Cohen-Adad, J., Polimeni, J.R., Yaseen, M.A., Lo, E.H., Greve, D.N., Buxton, R.B., Dale, A.M., Devor, A., Boas, D.A., 2015. Quantifying the Microvascular Origin of BOLD-fMRI from First Principles with Two-Photon Microscopy and an Oxygen-Sensitive Nanoprobe. *J. Neurosci.* 35, 3663–3675. <https://doi.org/10.1523/JNEUROSCI.3555-14.2015>
- Gagnon, L., Sakadžić, S., Lesage, F., Pouliot, P., Dale, A.M., Devor, A., Buxton, R.B., Boas, D.A., 2016. Validation and optimization of hypercapnic-calibrated fMRI from oxygen-sensitive two-photon microscopy. *Philos. Trans. R. Soc. B Biol. Sci.* 371. <https://doi.org/10.1098/rstb.2015.0359>
- Gauthier, C.J., Hoge, R.D., 2013. A generalized procedure for calibrated MRI incorporating hyperoxia and hypercapnia. *Hum. Brain Mapp.* 34, 1053–69. <https://doi.org/10.1002/hbm.21495>
- Griffeth, V.E.M., Blockley, N., Simon, A.B., Buxton, R.B., 2013. A New Functional MRI Approach for Investigating Modulations of Brain Oxygen Metabolism. *PLoS One* 8, e68122. <https://doi.org/10.1371/journal.pone.0068122>
- Griffeth, V.E.M., Buxton, R.B., 2011. A theoretical framework for estimating cerebral oxygen metabolism changes using the calibrated-BOLD method: Modeling the effects of blood volume distribution, hematocrit, oxygen extraction fraction, and tissue signal properties on the BOLD signal. *Neuroimage* 58, 198–212. <https://doi.org/10.1016/j.neuroimage.2011.05.077>
- Guo, J., Wong, E.C., 2012. Venous oxygenation mapping using velocity-selective excitation and arterial nulling. *Magn. Reson. Med.* 68, 1458–1471. <https://doi.org/10.1002/mrm.24145>
- Gur, R.E., Gur, R.C., 1990. Gender Differences in Regional Cerebral Blood Flow. *Schizophr. Bull.* 16, 247–254. <https://doi.org/10.1093/schbul/16.2.247>
- Ibaraki, M., Miura, S., Shimosegawa, E., Sugawara, S., Mizuta, T., Ishikawa, A., Amano, M., 2007. Quantification of Cerebral Blood Flow and Oxygen Metabolism with 3-Dimensional PET and 15O: Validation by Comparison with 2-Dimensional PET. *J. Nucl. Med.* 49, 50–59. <https://doi.org/10.2967/jnumed.107.044008>
- Ishii, K., Sasaki, M., Kitagaki, H., Sakamoto, S., Yamaji, S., Maeda, K., 1996. Regional difference in cerebral blood flow and oxidative metabolism in human cortex. *J Nucl Med* 37, 1086–1088.
- Ito, H., Kanno, I., Kato, C., Sasaki, T., Ishii, K., Ouchi, Y., Iida, A., Okazawa, H., Hayashida, K., Tsuyuguchi, N., Ishii, K., Kuwabara, Y., Senda, M., 2004. Database of normal human cerebral blood flow, cerebral blood volume, cerebral oxygen extraction fraction and cerebral metabolic rate of oxygen measured by positron emission tomography with 15 O-labelled carbon dioxide or water, carbon monoxide and oxygen: *Eur. J. Nucl. Med. Mol. Imaging* 31, 635–643. <https://doi.org/10.1007/s00259-003-1430-8>
- Jurado, R., Walker, H.K., 1969. *Clinical Methods The History, Physical, and Laboratory*

- Examinations. 3rd edition., in: *Clinical Methods The History, Physical, and Laboratory Examinations. 3rd Edition.* pp. 371–382. <https://doi.org/10.1080/01480545.2016.1245318>
- Kirchner, W.K., 1958. Age differences in short-term retention of rapidly changing information. *J. Exp. Psychol.* 55, 352–358. <https://doi.org/10.1037/h0043688>
- Liu, E.Y., Haist, F., Dubowitz, D.J., Buxton, R.B., 2019. Cerebral blood volume changes during the BOLD post-stimulus undershoot measured with a combined normoxia/hyperoxia method. *Neuroimage* 185, 154–163. <https://doi.org/10.1016/j.neuroimage.2018.10.032>
- Liu, T.T., Behzadi, Y., Restom, K., Uludag, K., Lu, K., Buracas, G.T., Dubowitz, D.J., Buxton, R.B., 2004. Caffeine alters the temporal dynamics of the visual BOLD response. *Neuroimage* 23, 1402–1413. <https://doi.org/10.1016/j.neuroimage.2004.07.061>
- Liu, T.T., Wong, E.C., 2005. A signal processing model for arterial spin labeling functional MRI. *Neuroimage* 24, 207–215. <https://doi.org/10.1016/j.neuroimage.2004.09.047>
- Lu, H., Xu, F., Grgac, K., Liu, P., Qin, Q., Van Zijl, P., 2012. Calibration and validation of TRUST MRI for the estimation of cerebral blood oxygenation. *Magn. Reson. Med.* 67, 42–49. <https://doi.org/10.1002/mrm.22970>
- Mark, C.I., Fisher, J.A., Pike, G.B., 2011. Improved fMRI calibration: Precisely controlled hyperoxic versus hypercapnic stimuli. *Neuroimage* 54, 1102–1111. <https://doi.org/10.1016/j.neuroimage.2010.08.070>
- Merola, A., Germuska, M.A., Murphy, K., Wise, R.G., 2018. Assessing the repeatability of absolute CMRO<sub>2</sub>, OEF and haemodynamic measurements from calibrated fMRI. *Neuroimage*. <https://doi.org/10.1016/j.neuroimage.2018.02.020>
- Merola, A., Murphy, K., Stone, A.J., Germuska, M.A., Griffeth, V.E.M., Blockley, N.P., Buxton, R.B., Wise, R.G., 2016. Measurement of oxygen extraction fraction (OEF): An optimized BOLD signal model for use with hypercapnic and hyperoxic calibration. *Neuroimage* 129, 159–174. <https://doi.org/10.1016/j.neuroimage.2016.01.021>
- Noll, D.C., Fessler, J.A., Sutton, B.P., 2005. Conjugate phase MRI reconstruction with spatially variant sample density correction. *IEEE Trans. Med. Imaging* 24, 325–336. <https://doi.org/10.1109/TMI.2004.842452>
- Pelli, D.G., 1997. The VideoToolbox software for visual psychophysics: transforming numbers into movies. *Spat. Vis.* 10, 437–442. <https://doi.org/10.1163/156856897X00366>
- Perthen, J.E., Lansing, A.E., Liau, J., Liu, T.T., Buxton, R.B., 2008. Caffeine-induced uncoupling of cerebral blood flow and oxygen metabolism: a calibrated BOLD fMRI study. *Neuroimage* 40, 237–47. <https://doi.org/10.1016/j.neuroimage.2007.10.049>
- Raichle, M.E., MacLeod, A.M., Snyder, A.Z., Powers, W.J., Gusnard, D.A., Shulman, G.L., 2001. A default mode of brain function. *Proc. Natl. Acad. Sci. U. S. A.* 98, 676–82. <https://doi.org/10.1073/pnas.98.2.676>
- Rodriguez, G., Warkentin, S., Risberg, J., Rosadini, G., 1988. Sex differences in regional cerebral blood flow. *J. Cereb. Blood Flow Metab.* 8, 783–789. <https://doi.org/10.1038/jcbfm.1988.133>
- Simon, A.B., Dubowitz, D.J., Blockley, N.P., Buxton, R.B., 2016. A novel Bayesian approach to accounting for uncertainty in fMRI-derived estimates of cerebral oxygen metabolism fluctuations. *Neuroimage* 129, 198–213. <https://doi.org/10.1016/j.neuroimage.2016.01.001>
- Trudnowski, R.J., Rico, R.C., 1974. Specific gravity of blood and plasma at 4 and 37 °C. *Clin. Chem.*
- Uhlirova, H., Kilic, K., Tian, P., Sakadz, S., Saisan, P.A., Gagnon, L., Thunemann, M., Nizar, K., Yasseen, M.A., Jr, D.J.H., Vandenberghe, M., Djurovic, S., Andreassen, O.A., Silva, G.A., Masliah, E., Kleinfeld, D., Vinogradov, S., Buxton, R.B., Einevoll, G.T., Boas, D.A., Dale, A.M., Devor, A., Devor, A., 2016a. The roadmap for estimation of cell-type- specific neuronal activity from non- invasive measurements. *Proc. R. Soc. London. Ser. B Biol. Sci.*

- <https://doi.org/10.1098/rstb.2015.0356>
- Uhlirva, H., Kiliç, K., Tian, P., Thunemann, M., Desjardins, M., Saisan, P.A., Sakadžić, S., Ness, T. V., Mateo, C., Cheng, Q., Weldy, K.L., Razoux, F., Vandenberghe, M., Cremonesi, J.A., Ferri, C.G.L., Nizar, K., Sridhar, V.B., Steed, T.C., Abashin, M., Fainman, Y., Masliah, E., Djurovic, S., Andreassen, O.A., Silva, G.A., Boas, D.A., Kleinfeld, D., Buxton, R.B., Einevol, G.T., Dale, A.M., Devor, A., 2016b. Cell type specificity of neurovascular coupling in cerebral cortex. *Elife* 5. <https://doi.org/10.7554/eLife.14315>
- Wang, J., Qiu, M., Constable, R.T., 2005. In vivo method for correcting transmit/receive nonuniformities with phased array coils. *Magn. Reson. Med.* 53, 666–674. <https://doi.org/10.1002/mrm.20377>
- Wise, R.G., Harris, A.D., Stone, A.J., Murphy, K., 2013. Measurement of OEF and absolute CMRO<sub>2</sub>: MRI-based methods using interleaved and combined hypercapnia and hyperoxia. *Neuroimage* 83, 135–147. <https://doi.org/10.1016/j.neuroimage.2013.06.008>
- Wong, E.C., Buxton, R.B., Frank, L.R., 1998. Quantitative imaging of perfusion using a single subtraction (QUIPSS and QUIPSS II). *Magn. Reson. Med.* 39, 702–708. <https://doi.org/10.1002/mrm.1910390506>
- Yablonskiy, D.A., 1998. Quantitation of intrinsic magnetic susceptibility-related effects in a tissue matrix. Phantom study. *Magn. Reson. Med.* 39, 417–428. <https://doi.org/10.1002/mrm.1910390312>
- Yablonskiy, D.A., Haacke, E.M., 1994. Theory of NMR signal behavior in magnetically inhomogeneous tissues: The static dephasing regime. *Magn. Reson. Med.* 32, 749–763. <https://doi.org/10.1002/mrm.1910320610>
- Zhao, J.M., Clingman, C.S., Närväinen, M.J., Kauppinen, R.A., Van Zijl, P.C.M., 2007. Oxygenation and hematocrit dependence of transverse relaxation rates of blood at 3T. *Magn. Reson. Med.* <https://doi.org/10.1002/mrm.21342>

## **Data and code availability**

The data that support the findings of this study are available from the corresponding author, RBB, upon reasonable request. The data and code sharing adopted by the authors comply with requirements by the National Institutes of Health and by the University of California, San Diego, and comply with institutional ethics approval.
